# Supplementary material
Source: publisher figshare collection journal article supplement (https://acs.figshare.com/ndownloader/files/23536621)
Supplement: Supplementary file 1 [file 23536621]

## Sheet: GEO12 with trans-DCE
culture	strain GEO12
substrate	trans-DCE
	chlorinated compounds						cell density		transcript per cell
Time (hour)	Ethene		VC		trans-DCE		cell density		16s transcript		tceA		vcrA		Rdh1		Rdh2		Rdh3		Rdh4		Rdh5		rpoB not quantified
	µmole per Bottle	Std. Deviation	µmole per Bottle	Std. Deviation	µmole per Bottle	Std. Deviation	16s per mL	St. Dev	transcript per cell	Std. Deviation	transcript per cell	Std. Deviation	transcript per cell	Std. Deviation	transcript per cell	Std. Deviation	transcript per cell	Std. Deviation	transcript per cell	Std. Deviation	transcript per cell	Std. Deviation	transcript per cell	Std. Deviation
0	60.3355	2.81293	0	0	0	0	535754400	7.49289e+07	13053.6	8428.34	0.0934437	0.0439214	4.8155	2.44408	0.002982	0.000250625	0.0101585	0.000551094	0.00284861	0.000944698	0.000605344	1.41273e-05	0.00192871	0.000453227
4	54.825	3.22688	13.5893	0.0123795	50.8576	1.3151	665865050	8.79481e+07	18182.9	2391.46	12.5102	7.53638	25.6378	17.8838	0.00875502	0.00523071	0.0235898	0.00652128	0.00577675	0.00110695	0.00114616	0.000112374	0.00317091	0.000780304
11	54.5952	1.7047	20.3383	0.0526434	39.8386	1.4924	795975700	1.00967e+08	39717.6	10753.6	204.769	16.7238	210.444	27.8615	0.0582307	0.000661712	0.0600342	0.00598932	0.00944182	0.00146876	0.00292889	1.97147e-05	0.0194478	0.00293815
26.5							918870250	5.04837e+07	38443.8	13126.3	219.815	54.8431	435.725	48.355	0.0778284	0.0217112	0.0669913	0.0146811	0.0114155	0.00278297	0.00657955	0.00178674	0.0251638	0.00342655
32.5	58.6608	1.87071	26.4001	1.16828	24.3656	2.03734	1041764800	0	35032.8	21964.1	219.392	130.749	445.775	74.437	0.064232	0.0434728	0.0769591	0.0444363	0.0192949	0.0117275	0.00787779	0.00218014	0.090867	0.0198759
49.5							1000005100	2.94637e+07	23635.3	3947.34	193.411	33.1949	597.189	10.5222	0.0486929	0.0107471	0.0623672	0.00837983	0.0144055	0.00355987	0.0106798	0.00425671	0.137855	0.0448748
57	66.7185	2.83022	21.8981	0.776004	13.2194	1.16957	958245400	5.89275e+07	32494.3	8347.43	244.496	138.82	746.661	188.564	0.0575108	0.0170872	0.0950653	0.0312634	0.021603	0.00109223	0.0235224	0.00288015	0.208979	0.0494005
72.5							979184500	2.14102e+08	35300.7	20781.9	214.403	94.2286	569.06	233.771	0.0573064	0.0401201	0.103179	0.042553	0.0292568	0.0178858	0.0187369	0.00776597	0.216681	0.0927813
79.5	74.9145	5.83262	14.7076	0.519585	7.25329	1.02527	979184500	2.14102e+08	21266.8	6961.18	178.55	37.804	442.294	80.0438	0.0541612	0.00277187	0.0625127	0.0127165	0.0343979	0.00542243	0.0194496	0.00437831	0.16933	0.0387789
96.5	79.7311	5.00768	0	0	3.24843	0.404437	979184500	2.14102e+08	37572.6	15985.6	85.6753	19.444	375.586	15.2453	0.0600452	0.0205152	0.0429409	0.018388	0.0242906	0.00536432	0.0171545	0.00889405	0.0953643	0.0242083
103.5	74.0008	4.83882	0	0	0	0	1000123600	3.69277e+08	22750	193.859	7.51264	2.72911	73.2372	22.6479	0.0203863	0.0101934	0.019406	0.0117524	0.0120723	0.00473931	0.00419062	0.0027286	0.0273735	0.0150254
									Note: the abnormally high 16S rRNA transcripts as well as other rdh transcripts are possibly caused by potential degradation of luciferase mRNA that was applied during RNA extraction of this experiment.
	transcript per 10^4 16S rRNA transcripts
	transcript per 10^4 16S rRNA transcripts
Time (hour)	tceA		vcrA		Rdh1		Rdh2		Rdh3		Rdh4		Rdh5		rpoB not quantified
	transcript per 10^4 16S rRNA transcripts	Std. Deviation	transcript per 10^4 16S rRNA transcripts	Std. Deviation	transcript per 10^4 16S rRNA transcripts	Std. Deviation	transcript per 10^4 16S rRNA transcripts	Std. Deviation	transcript per 10^4 16S rRNA transcripts	Std. Deviation	transcript per 10^4 16S rRNA transcripts	Std. Deviation	transcript per 10^4 16S rRNA transcripts	Std. Deviation
0	0.0715844	0.0336469	3.68902	1.87234	0.00228442	0.000191996	0.00778213	0.000422177	0.00218223	0.000723705	0.000463736	1.08225e-05	0.00147752	0.000347204
4	6.8802	4.14477	14.1	9.83553	0.00481498	0.00287672	0.0129736	0.0035865	0.00317703	0.000608786	0.000630352	6.1802e-05	0.0017439	0.000429142
11	51.5564	4.21068	52.9852	7.01491	0.0146612	0.000166604	0.0151153	0.00150798	0.00237724	0.000369801	0.00073743	4.96374e-06	0.00489653	0.00073976
26.5	57.1781	14.2658	113.341	12.5781	0.0202447	0.0056475	0.0174257	0.00381885	0.00296941	0.000723905	0.00171147	0.000464767	0.0065456	0.000891312
32.5	62.6247	37.3219	127.245	21.2478	0.0183348	0.0124092	0.0219677	0.0126842	0.00550767	0.00334757	0.00224869	0.000622313	0.0259377	0.00567352
49.5	81.8313	14.0446	252.668	4.45189	0.0206017	0.00454703	0.0263873	0.00354547	0.00609489	0.00150616	0.00451856	0.001801	0.058326	0.0189863
57	75.2428	42.7213	229.782	58.0298	0.0176987	0.00525851	0.029256	0.00962119	0.00664824	0.000336129	0.00723893	0.000886354	0.0643124	0.0152028
72.5	60.736	26.6931	161.204	66.2227	0.0162338	0.0113652	0.0292285	0.0120544	0.00828788	0.00506668	0.00530779	0.00219995	0.0613814	0.0262831
79.5	83.957	17.776	207.973	37.6378	0.0254674	0.00130337	0.0293945	0.00597949	0.0161744	0.00254971	0.00914553	0.00205875	0.0796215	0.0182344
96.5	22.8026	5.17506	99.9628	4.05755	0.0159811	0.00546017	0.0114288	0.004894	0.00646498	0.00142772	0.00456569	0.00236717	0.0253814	0.00644309
103.5	3.30226	1.19961	32.1922	9.95513	0.00896102	0.00448062	0.00853009	0.0051659	0.00530648	0.00208321	0.00184203	0.00119938	0.0120323	0.00660457

## Sheet: GEO12 with 12-DCA 
culture	strain GEO12
substrate	1,2-DCA
	chlorinated compounds				cell density		transcript per cell
Time (hour)	Ethene		1,2-DCA		cell density		16s transcript		tceA		vcrA		Rdh1		Rdh2		Rdh3		Rdh4		Rdh5		rpoB cDNA
	µmole per Bottle	Std. Deviation	µmole per Bottle	Std. Deviation	16s per mL	St. Dev	transcript per cell	Std. Deviation	transcript per cell	Std. Deviation	transcript per cell	Std. Deviation	transcript per cell	Std. Deviation	transcript per cell	Std. Deviation	transcript per cell	Std. Deviation	transcript per cell	Std. Deviation	transcript per cell	Std. Deviation	transcript per cell	Std. Deviation
0	53.3779	4.55619	27.263	0.2985	581393275	4.87476e+06	509.75	72.9108	0.0312384	0.00261581	0.0864827	0.0371374	0.000498616	0.000168409	0.00269898	0.00325659	0.000796347	0.00110218	0.000254043	0.000349142	0.00110225	0.00146179	0.00132716	0.000354419
2					5.55392e+08	5.64591e+06	810.808	73.9028	4.65991	4.66555	0.54484	0.356839	0.00111377	0.00109815	0.00137421	0.000314762	0.000279688	0.000186247	3.39824e-05	4.91037e-06	0.000202473	2.13687e-05	0.759282	0.41639
5					529391100	6.41706e+06	1163.79	229.438	8.5416	0.68421	0.716911	0.270488	0.00133014	0.000816996	0.00242216	0.000518701	0.000115532	8.05306e-05	1.64795e-05	7.19332e-06	0.000273795	0.000194791	0.936845	0.293775
7.5	54.989	2.68836	24.2448	1.69248	613163875	5.45102e+06	2567.69	1762.54	11.5281	0.573559	1.30653	0.576639	0.0056863	0.00013863	0.0043353	0.00177514	0.000193858	0.000131154	7.97078e-05	3.80612e-05	0.000278093	9.5906e-05	1.95726	0.814831
10.5					696936650	4.48497e+06	2283.9	1112.92	11.1895	0.759243	1.0587	0.11487	0.00580838	0.00111379	0.00316109	0.000147914	0.000175173	3.42296e-05	5.49544e-05	1.12099e-05	0.000285377	0.000153496	1.35885	0.17339
24	64.3242	1.98647	13.5983	2.00075	6.78901e+08	3.49172e+07	2333.67	150.749	26.8602	2.2262	1.40037	0.177364	0.0238376	0.00532527	0.00355671	0.00125411	0.000139589	5.28416e-05	8.17915e-05	3.69755e-05	0.000359627	8.95899e-05	0.854056	0.0543226
28					6.78901e+08	3.49172e+07	2088	442.222	24.2439	0.943552	1.01439	0.243701	0.0139969	0.00298002	0.00237007	0.000560209	0.000103424	7.30893e-05	6.58011e-05	3.33646e-05	0.000277048	7.92096e-05	0.534105	0.0402372
32.5					660865975	6.53494e+07	2047.06	798.94	22.4161	2.89002	1.31153	0.521125	0.017075	0.00820659	0.00287181	0.00128382	0.000132964	2.98038e-05	7.62543e-05	5.23303e-05	0.000282017	8.50195e-05	0.55187	0.364091
48.5	73.9115	3.63843	1.592	2.75742	7.0555e+08	2.49855e+07	1563.46	290.747	18.1026	0.110938	0.780453	0.13617	0.0125252	0.000577482	0.00315278	0.00082399	8.35639e-05	2.89071e-05	3.4484e-05	3.12345e-06	0.000220523	0.000109973	0.128663	0.0286645
82.5					7.0555e+08	2.49855e+07	1016.06	224.758	0.380444	0.199857	0.367115	0.00247335	0.00983506	0.00447056	0.000432648	6.76953e-05	3.59818e-05	2.73203e-06	1.00335e-05	2.28188e-06	0.000107565	2.54064e-05	0.00939541	0.00203078
96	72.8728	1.31003	0	0	750234650	1.53784e+07	747.262	82.2272	0.0956548	0.000122219	0.237599	0.0589716	0.00203974	0.000245414	0.000216664	7.7181e-05	4.38188e-05	6.06241e-05	1.64091e-05	1.68136e-06	7.94227e-05	5.65924e-05	0.00212968	0.000255319
	transcript per 10^4 16S rRNA transcripts
	transcript per 10^4 16S rRNA transcripts
Time (hour)	tceA		vcrA		Rdh1		Rdh2		Rdh3		Rdh4		Rdh5		rpoB cDNA
	transcript per 10^4 16S rRNA transcripts	Std. Deviation	transcript per 10^4 16S rRNA transcripts	Std. Deviation	transcript per 10^4 16S rRNA transcripts	Std. Deviation	transcript per 10^4 16S rRNA transcripts	Std. Deviation	transcript per 10^4 16S rRNA transcripts	Std. Deviation	transcript per 10^4 16S rRNA transcripts	Std. Deviation	transcript per 10^4 16S rRNA transcripts	Std. Deviation	transcript per 10^4 16S rRNA transcripts	Std. Deviation
0	0.612818	0.0513155	1.69657	0.728541	0.00978158	0.00330375	0.0529472	0.063886	0.0156223	0.0216219	0.00498367	0.00684927	0.0216234	0.0286767	0.0260355	0.00695279
2	57.4725	57.5419	6.71971	4.40103	0.0137366	0.0135439	0.0169487	0.00388208	0.00344949	0.00229705	0.000419118	6.05614e-05	0.00249718	0.000263548	9.36452	5.13549
5	73.3949	5.87917	6.16016	2.32421	0.0114294	0.00702015	0.0208128	0.00445701	0.000992723	0.000691971	0.000141602	6.18096e-05	0.00235262	0.00167377	8.04997	2.5243
7.5	44.8968	2.23376	5.08835	2.24575	0.0221456	0.000539903	0.0168841	0.00691339	0.000754991	0.000510787	0.000310427	0.000148232	0.00108305	0.000373511	7.62264	3.17341
10.5	48.9931	3.32433	4.63551	0.502957	0.0254319	0.00487672	0.0138408	0.000647637	0.00076699	0.000149874	0.000240617	4.90823e-05	0.00124952	0.000672081	5.94969	0.759185
24	115.099	9.53949	6.00075	0.760023	0.102146	0.0228193	0.0152409	0.00537398	0.000598154	0.000226432	0.000350485	0.000158444	0.00154104	0.000383902	3.65972	0.232778
28	116.111	4.51893	4.8582	1.16715	0.067035	0.0142721	0.0113509	0.002683	0.000495326	0.000350045	0.00031514	0.000159792	0.00132686	0.000379357	2.55798	0.192707
32.5	109.504	14.1179	6.4069	2.54572	0.0834122	0.0400896	0.0140289	0.00627154	0.000649534	0.000145593	0.000372506	0.000255637	0.00137767	0.000415325	2.69592	1.7786
48.5	115.786	0.709568	4.99182	0.870954	0.0801122	0.0036936	0.0201654	0.00527029	0.000534479	0.000184891	0.000220562	1.99777e-05	0.00141048	0.000703392	0.822938	0.18334
82.5	3.74432	1.96698	3.61313	0.0243426	0.0967963	0.0439991	0.00425811	0.000666254	0.000354131	2.68885e-05	9.87497e-05	2.24581e-05	0.00105865	0.000250049	0.0924692	0.0199869
96	1.28007	0.00163556	3.1796	0.789168	0.0272962	0.00328418	0.00289943	0.00103285	0.000586392	0.000811283	0.000219589	2.25002e-05	0.00106285	0.00075733	0.0284998	0.00341673

## Sheet: GEO12 with TCE
culture	strain GEO12
substrate	TCE
	chlorinated compounds								cell density		transcript per cell
Time (hour)	Ethene		VC		cis-DCE		TCE		cell density		16s transcript		tceA		vcrA		Rdh1		Rdh2		Rdh3		Rdh4		Rdh5		rpoB cDNA
	µmole per Bottle	Std. Deviation	µmole per Bottle	Std. Deviation	µmole per Bottle	Std. Deviation	µmole per Bottle	Std. Deviation	16s per mL	St. Dev	transcript per cell	Std. Deviation	transcript per cell	Std. Deviation	transcript per cell	Std. Deviation	transcript per cell	Std. Deviation	transcript per cell	Std. Deviation	transcript per cell	Std. Deviation	transcript per cell	Std. Deviation	transcript per cell	Std. Deviation	transcript per cell	Std. Deviation
0	49.117	5.24201	0	0	0	0	80.9084	13.3417	683370950	1.3625e+07	1526.83	353.674	0.00927688	0.00118285	0.248154	0.0136764	0.000253238	0.000136133	0.000458859	2.50723e-05	0.000160963	6.38206e-05	5.36715e-05	1.31392e-05	0.000173732	3.65081e-05	0.00373373	0.000661598
4											1437.48	528.445	0.456224	0.0715491	5.03511	2.04168	0.000706986	0.000393516	0.00181248	0.000827647	0.000472091	0.000370194	0.000107575	5.81066e-05	0.000839129	0.00059457	0.143432	0.0652363
11									703994400	3.86623e+07	3000.13	134.181	4.5811	0.509105	13.5548	0.0899853	0.00408629	0.00293226	0.00832761	0.00654786	0.00203309	0.00222265	0.000518654	0.000363523	0.00146433	0.000772813	0.619936	0.20557
26.5	50.0866	4.96684	8.28491	14.3499	9.37302	1.59373	37.1023	9.92605	749985775	9.34722e+07	2578.59	1147.26	9.47367	5.91653	18.35	6.11	0.00300912	0.00234039	0.00300485	0.00222861	0.000456328	0.000220838	0.000338495	0.000279579	0.00120377	0.000986327	1.30048	0.655743
32.5											3038.03	900.059	12.6174	3.11793	11.7128	2.31406	0.00439083	0.00325457	0.00412204	0.00215538	0.000476913	0.000305316	0.000395554	0.000125715	0.00179848	0.00100372	1.98203	0.876529
49.5	47.0429	3.46564	23.8829	1.39605	7.20482	1.21121	17.8295	0.555727			4154.04	1562.12	11.12	5.97278	18.084	6.38651	0.00406653	0.00198655	0.00417429	0.00286297	0.000988694	0.000625672	0.000531643	0.000270361	0.00189787	0.00131103	1.44243	0.724
57											4296.79	379.8	10.9407	2.86649	24.9848	2.58754	0.00537546	0.000683866	0.00892834	0.00526731	0.00195367	0.000384196	0.000863664	0.000249589	0.00513242	0.000619756	1.22242	0.601091
72.5	47.3877	8.31852	24.5948	0.77221	2.98606	0.566749	5.69708	1.33757	996224025	1.03362e+07	4166.23	1506.03	7.95921	4.27222	14.8595	4.63301	0.00309882	0.00105652	0.00259234	0.00095416	0.000543305	2.52557e-05	0.000497018	0.000221122	0.00150066	0.000808387	0.787845	0.534963
79.5											3800.05	845.496	4.39234	3.32482	10.0641	3.88876	0.00349036	0.000369089	0.00393229	0.00193055	0.000761869	0.00059839	0.000416641	4.02978e-06	0.00131482	0.000639011	0.588871	0.471951
96.5	49.2732	7.82899	28.1889	2.30843	0	0	0	1.74281			3618.81	464.181	11.5485	0.230389	22.214	8.70104	0.00628661	0.000595907	0.00385506	0.000285357	0.000734986	0.00033351	0.000532788	0.000126344	0.00175891	7.1244e-05	0.668622	0.0180241
103.5											3582.14	1981.25	8.58727	9.05099	26.8943	10.0621	0.00648717	0.00180365	0.00391005	0.00116826	0.000660565	0.0005655	0.000563108	0.000422463	0.00350043	0.00237871	0.685438	0.598256
120	51.479	1.01558	15.6083	13.5454	0	0	0	0			3573.32	447.568	2.61602	0.181874	17.6969	3.27302	0.00478055	0.00124219	0.00205943	0.000307967	0.000610458	9.18591e-05	0.000444424	8.6867e-05	0.0020611	9.6352e-05	0.156772	0.0373891
144.5	55.9318	6.14949	0	0	0	0	0	0	993256700	3.0406e+07	2564.78	2013.77	0.902883	0.306306	5.02524	0.845236	0.000788604	0.00041574	0.000870745	0.000763262	0.000605244	0.000551983	0.000668122	0.000658744	0.000909911	0.000567538	0.0299875	0.00758385
	transcript per 10^4 16S rRNA transcripts
Time (hour)	tceA		vcrA		Rdh1		Rdh2		Rdh3		Rdh4		Rdh5		rpoB cDNA
	transcript per 10^4 16S rRNA transcripts	Std. Deviation	transcript per 10^4 16S rRNA transcripts	Std. Deviation	transcript per 10^4 16S rRNA transcripts	Std. Deviation	transcript per 10^4 16S rRNA transcripts	Std. Deviation	transcript per 10^4 16S rRNA transcripts	Std. Deviation	transcript per 10^4 16S rRNA transcripts	Std. Deviation	transcript per 10^4 16S rRNA transcripts	Std. Deviation	transcript per 10^4 16S rRNA transcripts	Std. Deviation
0	0.0607592	0.00774711	1.62529	0.0895743	0.00165859	0.000891611	0.00300531	0.000164212	0.00105423	0.000417995	0.000351523	8.60557e-05	0.00113786	0.000239111	0.0244542	0.00433316
4	3.17377	0.497739	35.0272	14.2032	0.00491822	0.00273753	0.0126087	0.00575761	0.00328415	0.00257529	0.000748354	0.000404225	0.00583749	0.00413619	0.9978	0.453823
11	15.2697	1.69694	45.1809	0.299938	0.0136204	0.0097738	0.0277575	0.0218253	0.00677668	0.00740853	0.00172877	0.00121169	0.00488088	0.00257593	2.06637	0.685206
26.5	36.7398	22.9449	71.163	23.6952	0.0116697	0.00907627	0.0116531	0.00864276	0.00176968	0.000856431	0.00131272	0.00108423	0.00466833	0.00382507	5.0434	2.54303
32.5	41.5315	10.263	38.5538	7.61697	0.0144529	0.0107128	0.0135682	0.00709467	0.00156981	0.00100498	0.00130201	0.000413806	0.00591988	0.00330385	6.52408	2.88519
49.5	26.7692	14.3783	43.5335	15.3742	0.00978935	0.00478222	0.0100488	0.00689201	0.00238008	0.00150618	0.00127982	0.000650839	0.00456873	0.00315603	3.47235	1.74288
57	25.4625	6.67124	58.1476	6.02203	0.0125104	0.00159157	0.0207791	0.0122587	0.00454681	0.000894147	0.00201002	0.000580873	0.0119448	0.00144237	2.84497	1.39893
72.5	19.1041	10.2544	35.6666	11.1204	0.00743794	0.00253592	0.00622228	0.00229022	0.00130407	6.06202e-05	0.00119297	0.000530749	0.00360196	0.00194033	1.89103	1.28405
79.5	11.5586	8.7494	26.4842	10.2335	0.00918504	0.000971275	0.010348	0.00508034	0.00200489	0.00157469	0.00109641	1.06045e-05	0.00346	0.00168159	1.54964	1.24196
96.5	31.9126	0.636642	61.3849	24.0439	0.0173721	0.00164669	0.0106529	0.00078854	0.00203102	0.000921603	0.00147227	0.000349133	0.00486047	0.000196872	1.84763	0.0498067
103.5	23.9725	25.267	75.0788	28.0896	0.0181098	0.00503512	0.0109154	0.00326136	0.00184405	0.00157867	0.00157199	0.00117936	0.00977191	0.00664049	1.91349	1.67011
120	7.32099	0.508978	49.5253	9.15962	0.0133785	0.00347631	0.00576336	0.000861852	0.00170838	0.00025707	0.00124373	0.000243099	0.00576803	0.000269643	0.438731	0.104634
144.5	3.52032	1.19428	19.5933	3.29556	0.00307475	0.00162096	0.00339502	0.00297594	0.00235983	0.00215217	0.00260499	0.00256843	0.00354772	0.00221282	0.116921	0.0295693

## Sheet: GEO12 with TCE+CF
culture	strain GEO12
substrate	TCE
chloroform	50 µM
	chlorinated compounds						cell density		transcript per cell
Time (hour)	Ethene		VC		TCE		cell density		16s transcript		tceA		vcrA		Rdh1		Rdh2		Rdh3		Rdh4		Rdh5		rpoB cDNA
	µmole per Bottle	Std. Deviation	µmole per Bottle	Std. Deviation	µmole per Bottle	Std. Deviation	16s per mL	St. Dev	transcript per cell	Std. Deviation	transcript per cell	Std. Deviation	transcript per cell	Std. Deviation	transcript per cell	Std. Deviation	transcript per cell	Std. Deviation	transcript per cell	Std. Deviation	transcript per cell	Std. Deviation	transcript per cell	Std. Deviation	transcript per cell	Std. Deviation
0	37.7546	1.45861	0	0	53.5829	7.55006	952556000	6.50022e+07	2004.74	6.37975	0.0114173	0.00590354	0.102259	0.0302852	1.16059e-05	9.44818e-07	2.05198e-05	6.08485e-06	2.25637e-05	1.49819e-06	6.88354e-05	2.03759e-05	0.000101225	4.51145e-06	0.000855174	0.000119332
2.5									3185.66	307.017	0.531605	0.0197809	3.54115	0.168697											0.0778518	0.0318946
7									3826.09	528.543	3.10451	0.960158	14.3126	5.99047											0.295355	0.0901378
24									5216.76	943.271	7.01049	1.43573	12.9388	5.82435											0.830693	0.24981
48	38.3281	0.5071	7.86307	0.471778	31.0878	1.51331	1130480500	182373875	4774.25	784.985	6.82098	0.699686	9.70207	0.583593											0.523733	0.0995278
72									4437.66	1077.13	5.36067	3.06471	9.97532	5.47871											0.298532	0.20878
144	47.5874	1.61121	15.3424	0.411018	12.6573	2.30552	1112647100	4.3138e+07	4173.21	1623.41	8.30861	3.4306	17.1398	10.0673	0.00184904	0.00119821	0.000731215	0.000356845	0.000229022	9.3428e-05	0.00270623	0.00106924	0.00334303	0.00164284	0.427735	0.242324
168									4983.9	0	8.14957	5.24319	13.8477	8.4507											0.40619	0.296983
192	51.1644	1.09033	16.636	1.41923	6.28592	1.26439			4538.15	492.975	7.73777	1.38716	17.2981	4.36968											0.292322	0.0941222
240							649916300	177011025	5607.42	669.348	3.88267	3.10228	14.6194	5.62428											0.111839	0.0706005
289	59.9997	2.24589	0	1.55865	0	0			5222.16	129.153	2.70235	3.63715	16.7475	0.837375	0.00166308	0.00101963	0.000485216	0.000551386	0.000247172	0.000229252	0.00627033	0.00705142	0.0038698	0.00483877	0.0316978	0.0376983
Below were calculated based on data above
	transcript per 10^4 16S rRNA transcripts
Time (hour)	tceA		vcrA		Rdh1		Rdh2		Rdh3		Rdh4		Rdh5		rpoB cDNA
	transcript per 10^4 16S rRNA transcripts	Std. Deviation	transcript per 10^4 16S rRNA transcripts	Std. Deviation	transcript per 10^4 16S rRNA transcripts	Std. Deviation	transcript per 10^4 16S rRNA transcripts	Std. Deviation	transcript per 10^4 16S rRNA transcripts	Std. Deviation	transcript per 10^4 16S rRNA transcripts	Std. Deviation	transcript per 10^4 16S rRNA transcripts	Std. Deviation	transcript per 10^4 16S rRNA transcripts	Std. Deviation
0	0.0569517	0.0294479	0.510084	0.151068	5.78923e-05	4.71292e-06	0.000102356	3.03523e-05	0.000112552	7.47325e-06	0.000343363	0.000101638	0.000504929	2.25039e-05	0.00426576	0.000595249
2.5	1.66874	0.0620935	11.1159	0.52955											0.244382	0.100119
7	8.11406	2.5095	37.4079	15.6569											0.771948	0.235587
24	13.4384	2.75215	24.8024	11.1647											1.59235	0.47886
48	14.287	1.46554	20.3217	1.22238											1.097	0.208468
72	12.0799	6.90613	22.4788	12.3459											0.672723	0.470472
144	19.9094	8.22054	41.0711	24.1237	0.00443074	0.00287119	0.00175216	0.000855085	0.00054879	0.000223876	0.00648478	0.00256215	0.00801069	0.00393665	1.02496	0.580665
168	16.3518	10.5202	27.7849	16.956											0.815003	0.595884
192	17.0505	3.05666	38.117	9.62876											0.644142	0.207402
240	6.92416	5.53245	26.0715	10.0301											0.199448	0.125905
289	5.17479	6.96484	32.0701	1.60351	0.00318467	0.0019525	0.00092915	0.00105586	0.000473314	0.000439	0.0120072	0.0135029	0.00741036	0.00926584	0.0606987	0.0721892

## Sheet: GEO12CF with TCE
culture	culture GEO12CF
substrate	TCE
	chlorinated compounds								cell density		transcript per cell
Time (hour)	Ethene		VC		cis-DCE		TCE		cell density		16s transcript		tceA		vcrA		Rdh1		Rdh2		Rdh3		Rdh4		Rdh5		rpoB not quantified
	µmole per Bottle	Std. Deviation	µmole per Bottle	Std. Deviation	µmole per Bottle	Std. Deviation	µmole per Bottle	Std. Deviation	16s per mL	St. Dev	transcript per cell	Std. Deviation	transcript per cell	Std. Deviation	transcript per cell	Std. Deviation	transcript per cell	Std. Deviation	transcript per cell	Std. Deviation	transcript per cell	Std. Deviation	transcript per cell	Std. Deviation	transcript per cell	Std. Deviation	transcript per cell	Std. Deviation
0	43.7449	3.28881	0	0	0	0	0	0	1.9205e+08	4.61137e+06	16800.8	2832.3	0.0434775	0.00308831	0.887709	0.215777	0.00011615	0.000127919	6.63825e-05	6.20079e-05	8.6034e-05	8.70697e-05	0.00184301	0.00164371	0.0021098	0.00211204
2.5	33.304	2.96662	0	0	2.31947	0.462138	55.0598	5.6431	2.20427e+08	7.77203e+06	38412	24558.1	4.16424	1.56132	87.8436	46.9363
5.5									2.48803e+08	1.09327e+07	39311.6	18432.8	14.4835	3.29813	164.125	58.7762
8.5	34.9832	2.92254	2.20562	0.293563	7.19373	0.65615	45.8811	2.31326	277179800	1.40933e+07	32788.5	10493.6	22.5778	6.83519	161.154	21.8864
24.5	37.1722	4.33797	5.96488	0.640704	7.44585	0.65615	35.5551	2.06326	258430100	1.26747e+07	48593.5	25871.6	45.0836	23.5634	168.575	0.947212	0.000691635	0.000417307	0.000465437	0.000266583	0.000332621	0.000102642	0.0200397	0.00573037	0.0829289	0.044339
32									3.20787e+08	8.4304e+07	45550.6	22080.9	37.3329	19.8286	165.851	4.10495
48.5	45.1864	2.34306	10.0336	1.25491	4.82383	1.44859	20.9327	2.24571	383143775	1.55933e+08	42097.4	7023.09	39.3352	22.1406	161.531	52.6737
102.5	52.482	5.1073	13.3864	1.06339	1.56312	1.39282	5.32167	2.11789	397148100	6.18395e+07	46071.8	34614.9	43.6726	31.4256	168.407	130.808
126.5	60.3121	3.5906	11.1478	2.5537	0.386579	0.669575	1.20836	2.09294	362701525	3.60205e+07	69956.7	11213.1	29.1016	6.7137	208.744	20.8744	0.000693682	0.000109895	0.0002611	0.000142309	0.000277511	9.93112e-05	0.0169634	0.0107791	0.0299526	0.00580397
168.5	69.847	6.52722	2.15198	3.72733	0	0	0	0	316860975	2.97243e+07	39532.9	10074.4	4.46231	3.57094	42.9546	30.7049	0.000326597	0.000157554	0.00015968	0.00011428	0.000225604	0.000225526	0.00964011	0.00324217	0.00744284	0.00193536
											Note: the abnormally high 16S rRNA transcripts as well as other rdh transcripts are possibly caused by potential degradation of luciferase mRNA that was applied during RNA extraction of this experiment.
Below were calculated based on data above
	transcript per 10^4 16S rRNA transcripts
Time (hour)	tceA		vcrA		Rdh1		Rdh2		Rdh3		Rdh4		Rdh5		rpoB not quantified
	transcript per 10^4 16S rRNA transcripts	Std. Deviation	transcript per 10^4 16S rRNA transcripts	Std. Deviation	transcript per 10^4 16S rRNA transcripts	Std. Deviation	transcript per 10^4 16S rRNA transcripts	Std. Deviation	transcript per 10^4 16S rRNA transcripts	Std. Deviation	transcript per 10^4 16S rRNA transcripts	Std. Deviation	transcript per 10^4 16S rRNA transcripts	Std. Deviation	transcript per 10^4 16S rRNA transcripts	Std. Deviation
0	0.0258783	0.0018382	0.528374	0.128433	6.91336e-05	7.6139e-05	3.95116e-05	3.69078e-05	5.12084e-05	5.18249e-05	0.00109698	0.000978354	0.00125578	0.00125711	0	0
2.5	1.0841	0.406467	22.8688	12.2192	0	0	0	0	0	0	0	0	0	0	0	0
5.5	3.68429	0.838971	41.7497	14.9514	0	0	0	0	0	0	0	0	0	0	0	0
8.5	6.88589	2.08463	49.1494	6.67502	0	0	0	0	0	0	0	0	0	0	0	0
24.5	9.27769	4.84909	34.6908	0.194926	0.000142331	8.58772e-05	9.57816e-05	5.48598e-05	6.84497e-05	2.11225e-05	0.00412395	0.00117925	0.0170658	0.00912447	0	0
32	8.1959	4.35308	36.4103	0.901184	0	0	0	0	0	0	0	0	0	0	0	0
48.5	9.34387	5.25938	38.3708	12.5124	0	0	0	0	0	0	0	0	0	0	0	0
102.5	9.47924	6.82101	36.5532	28.3922	0	0	0	0	0	0	0	0	0	0	0	0
126.5	4.15994	0.959694	29.839	2.9839	9.91587e-05	1.5709e-05	3.73231e-05	2.03425e-05	3.9669e-05	1.41961e-05	0.00242484	0.00154083	0.00428159	0.000829652	0	0
168.5	1.12876	0.903283	10.8656	7.76694	8.26141e-05	3.98538e-05	4.03917e-05	2.89076e-05	5.70675e-05	5.70476e-05	0.0024385	0.000820121	0.0018827	0.000489558	0	0

## Sheet: GEO12CF with TCE+CF
culture	culture GEO12CF
substrate	TCE
chloroform	50 µM
	chlorinated compounds								cell density		transcript per cell
Time (hour)	Ethene		VC		cis-DCE		TCE		cell density		16s transcript		tceA		vcrA		Rdh1		Rdh2		Rdh3		Rdh4		Rdh5		rpoB
	µmole per Bottle	Std. Deviation	µmole per Bottle	Std. Deviation	µmole per Bottle	Std. Deviation	µmole per Bottle	Std. Deviation	16s per mL	St. Dev	transcript per cell	Std. Deviation	transcript per cell	Std. Deviation	transcript per cell	Std. Deviation	transcript per cell	Std. Deviation	transcript per cell	Std. Deviation	transcript per cell	Std. Deviation	transcript per cell	Std. Deviation	transcript per cell	Std. Deviation	transcript per cell	Std. Deviation
0	0	0	0	0	0	0	41.5603	1.84071	2.89675e+07	1.86447e+06	4904.55	1073.05	11.4258	3.17783	22.2262	4.60025	0.0106303	0.00164516	0.00174179	0.000940478	0.016258	0.0103396	0.0385255	0.0106245	0.0420782	0.000404773	0.950242	0.0845963
6.5	0	0	0	0	0	0	53.4731	4.5237	4.08955e+07	3.72122e+06	3565.6	2665.69	24.1373	17.0861	29.8636	24.0806											2.29379	1.63765
23.5	0	0	0	0	0	0	48.1758	5.76009	3.98542e+07	506003	2432.43	2080.73	19.839	10.016	27.4011	10.8348											1.23679	0.700336
72.5	0.253267	0.0552362	0.914023	0.0963565	3.86579	0.203784	39.0215	3.05798	83121350	3.73158e+07	1253.92	339.609	12.417	5.41442	27.2635	10.6015	0.000911785	0.000588935	0.000529326	0.000418895	0.00318897	0.00301735	0.00369254	0.00287683	0.0264744	0.0173999	0.911572	0.359694
96	0.685048	0.0386494	1.62585	0.0738462	3.79856	0.154046	34.2735	6.26258	1.34118e+08	6.97801e+07	3273.53	3262.23	12.8311	4.91502	44.4267	3.55413											2.91723	3.0592
143.5	6.07394	0.678424	3.38168	0.179112	4.00025	0.688299	23.0199	2.90208	3.73349e+08	6.76468e+07	2106.17	309.235	17.3521	0.150144	51.0169	0.998156											1.16932	0.138502
191.5	27.2825	1.6777	2.06119	1.75321	0	0	5.39491	3.45858	475049375	2.96771e+07	5003.85	2330.91	31.5714	13.4986	84.3729	5.06238											1.51905	1.76868
240.5	30.816	2.72233	0	0	0	0	0	0	792104100	1.14403e+08	2473.73	1140.9	0.233644	0.20024	2.74085	2.22731	0.000226598	0.000105271	8.76644e-05	6.31873e-06	0.00126575	0.000167388	0.00262474	0.00220724	0.00202332	0.0012148	0.0180631	0.0082639
335.5	30.5103	3.79044	0	0	0	0	0	0	686454550	2.78841e+07	1579.99	10.2815	0.0231233	0.00424123	0.254231	0.00378347	6.4449e-05	2.11767e-05	9.69982e-05	1.53957e-05	0.00120325	0.000553444	0.000380316	9.16893e-05	0.00112459	0.000180421	0.0089029	0.000777952
Below were calculated based on data above
	transcript per 10^4 16S rRNA transcripts
Time (hour)	tceA		vcrA		Rdh1		Rdh2		Rdh3		Rdh4		Rdh5		rpoB
	transcript per 10^4 16S rRNA transcripts	Std. Deviation	transcript per 10^4 16S rRNA transcripts	Std. Deviation	transcript per 10^4 16S rRNA transcripts	Std. Deviation	transcript per 10^4 16S rRNA transcripts	Std. Deviation	transcript per 10^4 16S rRNA transcripts	Std. Deviation	transcript per 10^4 16S rRNA transcripts	Std. Deviation	transcript per 10^4 16S rRNA transcripts	Std. Deviation	transcript per 10^4 16S rRNA transcripts	Std. Deviation
0	23.2963	6.47935	45.3175	9.37956	0.0216743	0.00335435	0.00355137	0.00191756	0.0331487	0.0210817	0.0785505	0.0216624	0.0857941	0.0008253	1.93747	0.172485
6.5	67.6949	47.9192	83.7546	67.5358	0	0	0	0	0	0	0	0	0	0	6.43312	4.59291
23.5	81.5605	41.1769	112.649	44.5432	0	0	0	0	0	0	0	0	0	0	5.08458	2.87917
72.5	99.0252	43.1799	217.426	84.547	0.00727146	0.00469674	0.00422136	0.00334068	0.025432	0.0240633	0.0294479	0.0229427	0.211133	0.138764	7.26977	2.86855
96	39.1967	15.0144	135.715	10.8572	0	0	0	0	0	0	0	0	0	0	8.91159	9.34526
143.5	82.387	0.712878	242.226	4.73921	0	0	0	0	0	0	0	0	0	0	5.55191	0.657603
191.5	63.0942	26.9764	168.616	10.117	0	0	0	0	0	0	0	0	0	0	3.03575	3.53464
240.5	0.944502	0.809468	11.0799	9.00388	0.000916021	0.000425557	0.000354382	2.55434e-05	0.00511676	0.000676662	0.0106105	0.00892272	0.00817924	0.00491082	0.0730197	0.0334067
335.5	0.146351	0.0268434	1.60907	0.0239462	0.000407908	0.000134031	0.000613917	9.74417e-05	0.00761559	0.00350284	0.00240708	0.000580317	0.00711769	0.00114191	0.0563479	0.00492379
